# Supplementary material
Source: Research Square preprint supplement (doi:10.21203/rs.3.rs-9661158/v1)
Supplement: Supplementary file 1 [file f4c60d8dcf5f44eccc24a76f.docx]

**Supporting information**





**Figure S1**. A standard calibration curve was constructed by plotting the mass concentration of the CAR standard solution on the X-axis and the corresponding absorbance values on the Y-axis.

**Table S1**. Composition of the volatile flavor compounds in the postharvest roxburgh rose.

| No. | Compounds | CAS No. | Molecular formula | Flavor description | CK group | Treatment group |
| --- | --- | --- | --- | --- | --- | --- |
| 1 | Acetic acid | C64197 | C2H4O2 | spicy | 585.18±48.80 | 477.04±26.49 |
| 2 | Ethyl octanoate | C106321 | C10H20O2 | fruity, pineapple, apple, brandy | 719.01±96.98 | 482.73±45.79 |
| 3 | 1-Nonanal-M | C124196 | C9H18O | rose, citrus, strong oily | 1358.33±64.59 | 1869±230.21 |
| 4 | 1-Hexanol | C111273 | C6H14O | fresh, fruity, wine, sweet, green | 432.52±13.83 | 391.65±21.27 |
| 5 | 2-Methyl-2-hepten-6-one | C110930 | C8H14O | citrus, fruity, mouldy, ketone | 756.37±509.54 | 265.82±7.46 |
| 6 | 1-Octanal-M | C124130 | C8H16O | aldehyde, waxy, citrus, orange, fruity, fatty | 1775.87±71.37 | 2558.46±104.65 |
| 7 | 1-Octanal-D | C124130 | C8H16O | aldehyde, waxy, citrus, orange, fruity, fatty | 588.04±59.74 | 1476.88±270.11 |
| 8 | 1-Pentanol-M | C71410 | C5H12O | balsamic | 1451.90±66.12 | 1479.80±32.97 |
| 9 | 1-Pentanol-D | C71410 | C5H12O | balsamic | 527.19±64.26 | 436.86±42.42 |
| 10 | beta-Ocimene | C13877913 | C10H16 | floral, woody, fruity | 1166.68±74.43 | 1881.68±276.83 |
| 11 | Ethyl caproate-M | C123660 | C8H16O2 | pineapple, fruity, wine | 630.54±27.54 | 1162.48±61.11 |
| 12 | Butanoic acid butyl ester-M | C109217 | C8H16O2 | fruity, banana, pineapple, green cherry, tropical fruit mature and juicy fruity aroma | 654.17±28.01 | 450.74±10.41 |
| 13 | 1-Nonanal-D | C124196 | C9H18O | rose, citrus, strong oily | 161.79±15.04 | 313.35±81.97 |
| 14 | Hexanoic acid propyl ester | C626777 | C9H18O2 | fruity | 301.98±24.41 | 487.69±53.94 |
| 15 | (E)-2-Heptenal | C18829555 | C7H12O | spicy, green vegetables, fresh, fatty | 181.24±27.3 | 287.22±18.10 |
| 16 | Ethyl caproate-D | C123660 | C8H16O2 | pineapple, fruity, wine | 133.66±9.51 | 441.11±56.95 |
| 17 | (E)-2-Hexen-1-al-M | C6728263 | C6H10O | green, banana, fat | 449.56±19.12 | 1051.67±76.32 |
| 18 | Butanoic acid butyl ester-D | C109217 | C8H16O2 | fruity, banana, pineapple, green cherry, tropical fruit mature and juicy fruity aroma | 153.04±19.07 | 104.05±3.31 |
| 19 | 1-Butanol,3-methyl | C123513 | C5H12O | whiskey, banana, fruity | 346.25±5.72 | 164.06±0.48 |
| 20 | 2-methyl-1-butanol | C137326 | C5H12O | roast onion, fruity, floral, wine | 225.22±5.54 | 103.55±5.37 |
| 21 | Heptaldehyde-M | C111717 | C7H14O | fresh, aldehyde, fatty, green herbs, wine, fruity | 491.94±10.45 | 555.87±58.58 |
| 22 | 2-Heptanone | C110430 | C7H14O | pear, banana, fruity, slight medicinal fragrance | 1593.84±12.3 | 1689.40±25.85 |
| 23 | Hexanoic acid, methyl ester | C106707 | C7H14O2 | pineapple, apricot, fruity | 4464.44±134.47 | 3576.25±26.87 |
| 24 | 1-Butanol-M | C71363 | C4H10O | wine | 687.08±11.93 | 578.06±52.59 |
| 25 | 1-Butanol-D | C71363 | C4H10O | wine | 364.13±11.18 | 256.11±41.82 |
| 26 | Butyl propanoate-M | C590012 | C7H14O2 | earthy, sweet rose | 597.25±30.82 | 525.03±6.47 |
| 27 | Butyl propanoate-D | C590012 | C7H14O2 | earthy, sweet rose | 481.79±30.93 | 342.08±11.04 |
| 28 | (E)-2-Pentenal-M | C1576870 | C5H8O | potato, peas | 220.00±20.43 | 444.07±39.69 |
| 29 | 3-Penten-2-one | C625332 | C5H8O | Fruity, turns into spicy during storage | 175.73±4.01 | 39.40±4.37 |
| 30 | 1-Butanol,3-methyl-,acetate-M | C123922 | C7H14O2 | sweet, banana, fruity | 560.97±31.37 | 658.90±27.34 |
| 31 | 1-Butanol,3-methyl-,acetate-D | C123922 | C7H14O2 | sweet, banana, fruity | 218.20±25.98 | 257.98±30.23 |
| 32 | 2-Pentanol-M | C6032297 | C5H12O | fusel oil, green | 195.34±4.02 | 115.58±1.31 |
| 33 | 2-Pentanol-D | C6032297 | C5H12O | fusel oil, green | 80.64±3.93 | 31.21±1.37 |
| 34 | 1-Propanol,2-methyl | C78831 | C4H10O | fresh, alcoholic, leather | 384.81±5.93 | 342.05±14.15 |
| 35 | 2-Hexanone | C591786 | C6H12O | fruity, fungal, meaty, buttery | 137.67±6.24 | 69.71±4.17 |
| 36 | 3-Methyl-2-butanol | C598754 | C5H12O | fruity | 127.03±2.66 | 36.70±1.66 |
| 37 | 3-Hexanone-M | C589388 | C6H12O | fruity, grape, sweet, rum | 314.64±5.35 | 184.00±4.35 |
| 38 | 3-Hexanone-D | C589388 | C6H12O | fruity, grape, sweet, rum | 163.56±3.43 | 131.94±1.67 |
| 39 | 1-Hexanal-M | C66251 | C6H12O | fresh, green, fat, fruity | 617.87±6.16 | 725.52±15.64 |
| 40 | 1-Hexanal-D | C66251 | C6H12O | fresh, green, fat, fruity | 619.45±24.51 | 1195.31±69.39 |
| 41 | Acetic acid butyl ester-M | C123864 | C6H12O2 | fruity | 379.81±7.5 | 236.11±4.36 |
| 42 | Acetic acid butyl ester-D | C123864 | C6H12O2 | fruity | 294.65±8.42 | 103.83±14.65 |
| 43 | 2-Methylpropyl propionate-M | C540421 | C7H14O2 | rum, pineapple | 491.98±3.99 | 596.48±2.32 |
| 44 | 2-Methylpropyl propionate-D | C540421 | C7H14O2 | rum, pineapple | 1105.89±42.78 | 2434.84±52.83 |
| 45 | Butanoic acid 3-methyl, ethyl ester | C108645 | C7H14O2 | apple, banana, sour and sweet | 289.85±16.59 | 302.13±23.44 |
| 46 | 2-Methyl butanoic acid ethyl ester-M | C7452791 | C7H14O2 | apple | 607.22±21.58 | 825.81±6.62 |
| 47 | 2-Methyl butanoic acid ethyl ester-D | C7452791 | C7H14O2 | apple | 204.55±21.24 | 528.30±29.74 |
| 48 | 1-(1-Methylethyl)-4-methylbenzene | C99876 | C10H14 | fresh citrus terpene woody spice | 68.00±3.03 | 107.06±4.24 |
| 49 | (E)-2-Hexen-1-al-D | C6728263 | C6H10O | green, banana, fat | 88.23±2.7 | 522.98±95.36 |
| 50 | Heptaldehyde-D | C111717 | C7H14O | fresh, aldehyde, fatty, green herbs, wine, fruity | 138.24±15.56 | 160.81±24.34 |
| 51 | (E)-2-Pentenal-D | C1576870 | C5H8O | potato, peas | 57.25±6.78 | 132.84±26.97 |
| 52 | Butanoic acid ethyl ester-M | C105544 | C6H12O2 | pineapple, fruity, ester, whiskey | 570.27±2.73 | 839.63±10.88 |
| 53 | Butanoic acid ethyl ester-D | C105544 | C6H12O2 | pineapple, fruity, ester, whiskey | 1256.22±40.54 | 2425.64±64.59 |
| 54 | 1-Penten-3-one-M | C1629589 | C5H8O | strong pungent odors | 214.81±5.30 | 396.6±14.02 |
| 55 | 1-Penten-3-one-D | C1629589 | C5H8O | strong pungent odors | 278.71±47.16 | 590.68±57.56 |
| 56 | 4-Methyl-2-pentanone-D | C108101 | C6H12O | ketone | 1464.71±17.24 | 1812.7±33.74 |
| 57 | 2-Methyl-1-propyl acetate-M | C110190 | C6H12O2 | fruity, raw pear and raspberrie | 664.87±6.05 | 205.99±5.61 |
| 58 | 2-Methylbutanoic acid, methyl ester | C868575 | C6H12O2 | apple | 330.10±12.62 | 397.51±22.52 |
| 59 | n-Pentanal | C110623 | C5H10O | green grassy, faint banana, pungent | 1398.76±25.03 | 1367.29±57.64 |
| 60 | 2-Pentanone | C107879 | C5H10O | acetone, fresh, sweet fruity, wine | 586.19±16.81 | 468.76±4.82 |
| 61 | Acetic acid propyl ester-M | C109604 | C5H10O2 | fruity, pear | 145.48±5.4 | 164.59±2.65 |
| 62 | Acetic acid propyl ester-D | C109604 | C5H10O2 | fruity, pear | 366.49±18.95 | 452.30±17.13 |
| 63 | 4-Methyl-2-pentanone-M | C108101 | C6H12O | ketone | 406.51±13.77 | 543.65±15.25 |
| 64 | Ethyl 2-methy lpropionate-M | C97621 | C6H12O2 | sweet, fruity, alcoholic, rummy | 92.58±2.36 | 154.38±3.67 |
| 65 | Ethyl 2-methy lpropionate-D | C97621 | C6H12O2 | sweet, fruity, alcoholic, rummy | 82.24±5.78 | 310.81±14.31 |
| 66 | 2-Methyl-1-propyl acetate-D | C110190 | C6H12O2 | fruity, raw pear and raspberrie | 41.2±3.98 | 46.49±5.59 |
| 67 | Ethanol | C64175 | C2H6O | aromaticity | 5414.22±39.86 | 5074.52±93.00 |
| 68 | Acetic acid ethyl ester | C141786 | C4H8O2 | fresh, fruity, sweet, grassy | 4840.62±63.55 | 4994.45±3.78 |
| 69 | 2-Methyl butanal-M | C96173 | C5H10O | almond, cocoa, malt | 167.76±7.14 | 190.89±3.00 |
| 70 | 2-Methyl butanal-D | C96173 | C5H10O | almond, cocoa, malt | 868.17±17.13 | 340.96±20.56 |
| 71 | Butanal-M | C123728 | C4H8O | pungent, fruity, green leaf | 260.22±2.08 | 245.83±8.18 |
| 72 | Butanal-D | C123728 | C4H8O | pungent, fruity, green leaf | 253.45±5.15 | 271.64±37.78 |
| 73 | Methyl acetate-M | C79209 | C3H6O2 | ethereal | 324.12±1.45 | 362.06±3.82 |
| 74 | Methyl acetate-D | C79209 | C3H6O2 | ethereal | 1079.19±31.15 | 1259.07±5.32 |
| 75 | 2-Propanone | C67641 | C3H6O | fresh, apple, pear | 1132.35±23.15 | 692.08±15.25 |
| 76 | Propanal-M | C123386 | C3H6O | pungent, green grassy | 374.33±3.38 | 362.83±1.2 |
| 77 | Propanal-D | C123386 | C3H6O | pungent, green grassy | 581.05±14.17 | 569.16±33.68 |
| 78 | 2-Methyl propanal-M | C78842 | C4H8O | banana, melon, slightly nutty | 245.3±0.9 | 252.21±8.07 |
| 79 | 2-Methyl propanal-D | C78842 | C4H8O | banana, melon, slightly nutty | 411.03±3.81 | 221.98±7.86 |
| 80 | 2-Butanone-M | C78933 | C4H8O | fruity, camphor | 191.84±1.66 | 102.29±4.09 |
| 81 | 2-Butanone-D | C78933 | C4H8O | fruity, camphor | 378.88±5.74 | 71.95±6.80 |
| 82 | 2-Butanol | C78922 | C4H10O | fruity | 391.03±30.89 | 79.35±4.45 |
